# Supplementary material for: Colorless copper-containing coatings with high antimicrobial efficacy and formulation versatility
Source: Royal Society of Chemistry journal article supplement (doi:10.1039/d4lf00235k), 2024-12-20
Supplement: d4lf00235k1.pdf [file d4lf00235k1.pdf]

## Colorless Copper-Containing Coatings With High Antimicrobial Efficacy and Formulation Versatility

Johnathan D. Culpepper<sup>1</sup>, Anthony G. Frutos<sup>1</sup>, Jenna B. Yehl<sup>1</sup>, Theresa Chang<sup>1</sup>, Joydeep Lahiri<sup>1\*</sup>

<sup>1</sup>Corning Incorporated, 1 Riverfront Plaza, Corning, NY 14831, USA

\*Corresponding author

### Supplementary Information

#### Table of Contents

|                                                                                                                                                                                                                                                                                                                                                                                                                                                                                                                                                                                                                 |    |
|-----------------------------------------------------------------------------------------------------------------------------------------------------------------------------------------------------------------------------------------------------------------------------------------------------------------------------------------------------------------------------------------------------------------------------------------------------------------------------------------------------------------------------------------------------------------------------------------------------------------|----|
| <b>Copper Quantification Method Development</b> .....                                                                                                                                                                                                                                                                                                                                                                                                                                                                                                                                                           | 2  |
| <b>Figure S1:</b> Visual example of an CGC + Phosphite extraction sample prepared by the Neocuproine method showing crystallization and precipitation of the copper in a microcentrifuge tubes. ....                                                                                                                                                                                                                                                                                                                                                                                                            | 2  |
| <b>Figure S2:</b> <b>A.</b> UV-vis data for the copper sulfate/EDTA calibration curve. <b>B.</b> Absorbance at 740 nm versus copper(II) concentration calibration curves and line of best fit. ....                                                                                                                                                                                                                                                                                                                                                                                                             | 3  |
| <b>Figure S3:</b> UV-vis spectrum for CGC powder extracts with TEP. <b>A.</b> Sample Cu <sub>Tot</sub> curves. <b>B.</b> Curves used to derive [Cu <sup>2+</sup> ]. [Cu <sub>Tot</sub> ] determination was made by adding 700 μl of 20 mM EDTA, 388 μl H <sub>2</sub> O, 42 μl of copper extract solution, 20 μL of H <sub>2</sub> O <sub>2</sub> . [Cu <sup>2+</sup> ] determination was made by adding 700 μl of 20 mM EDTA, 398 μl H <sub>2</sub> O, 42 μl of copper extract solution. [Cu <sup>1+</sup> ] is calculated by taking the difference between [Cu <sub>Tot</sub> ] and [Cu <sup>2+</sup> ]. .... | 4  |
| <b><sup>31</sup>P{<sup>1</sup>H} NMR Parameters for Copper(I) Coordination Environment</b> .....                                                                                                                                                                                                                                                                                                                                                                                                                                                                                                                | 5  |
| <b>Figure S4:</b> <sup>31</sup> P NMR spectrum of CGC extracts with TEP showing an asymmetric quartet structure due to spin-spin coupling of the phosphorus nuclei to the copper nucleus ( <sup>63</sup> Cu, <sup>65</sup> Cu; <i>I</i> = 3/2) in water. ....                                                                                                                                                                                                                                                                                                                                                   | 5  |
| <b>Antimicrobial Glass Film Surface Metrology</b> .....                                                                                                                                                                                                                                                                                                                                                                                                                                                                                                                                                         | 7  |
| <b>Figure S5:</b> Zygo film thickness measurement for Ferro 221 series coating on Corning® EAGLE XG® Glass with no copper glass-ceramic (CGC) powder or CGC powder extract, flash cured at 150 °C. ....                                                                                                                                                                                                                                                                                                                                                                                                         | 7  |
| <b>Figure S6:</b> Zygo film surface roughness measurement for Ferro 221 series coating on Corning EAGLE XG Glass with no copper glass-ceramic (CGC) powder or CGC powder extract, flash cured at 150 °C. ...                                                                                                                                                                                                                                                                                                                                                                                                    | 8  |
| <b>Figure S7:</b> Zygo film thickness measurement for Ferro 221 glass coating on Corning EAGLE XG Glass dosed with copper glass-ceramic (CGC) powder extracts with triethyl phosphite (TEP) ([Cu] <sub>Tot</sub> = 600ppm) and cured at 120 °C. ....                                                                                                                                                                                                                                                                                                                                                            | 9  |
| <b>Figure S8:</b> Zygo film surface roughness measurement for Ferro 221 glass coating on Corning EAGLE XG Glass dosed with copper glass-ceramic (CGC) powder extracts with triethyl phosphite (TEP) ([Cu] <sub>Tot</sub> = 600ppm) and cured at 120 °C. ....                                                                                                                                                                                                                                                                                                                                                    | 10 |

## Copper Quantification Method Development

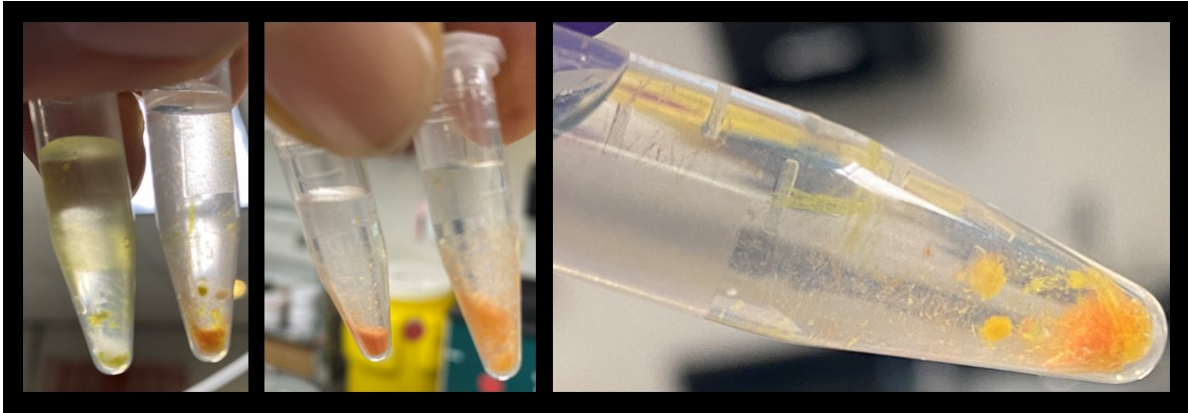

**Figure S1:** Visual example of CGC + Phosphite extraction samples prepared by the Neocuproine method showing crystallization and precipitation of the copper in microcentrifuge tubes.

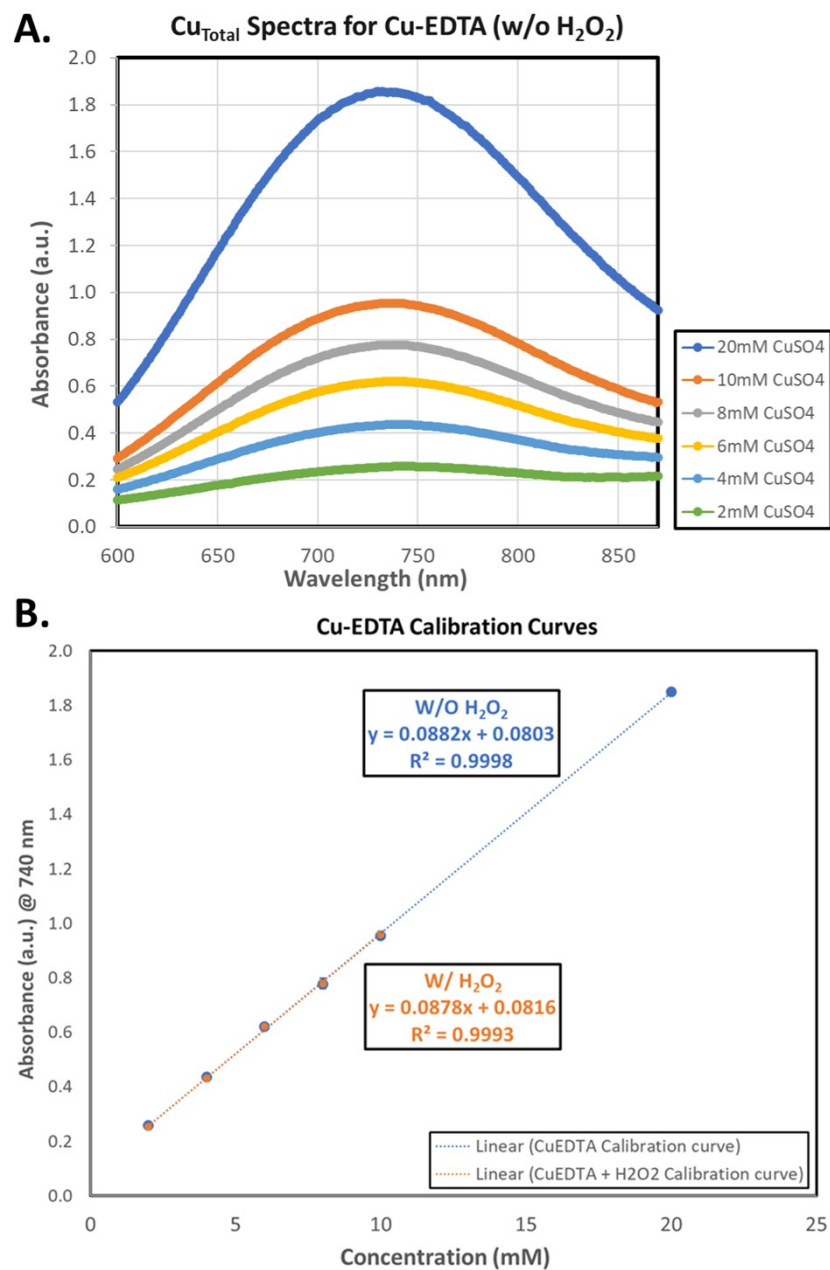

Figure S2: A. UV-vis data for the copper sulfate/EDTA calibration curve. B. Absorbance at 740 nm versus Cu<sup>2+</sup> concentration calibration curves and line of best fit.

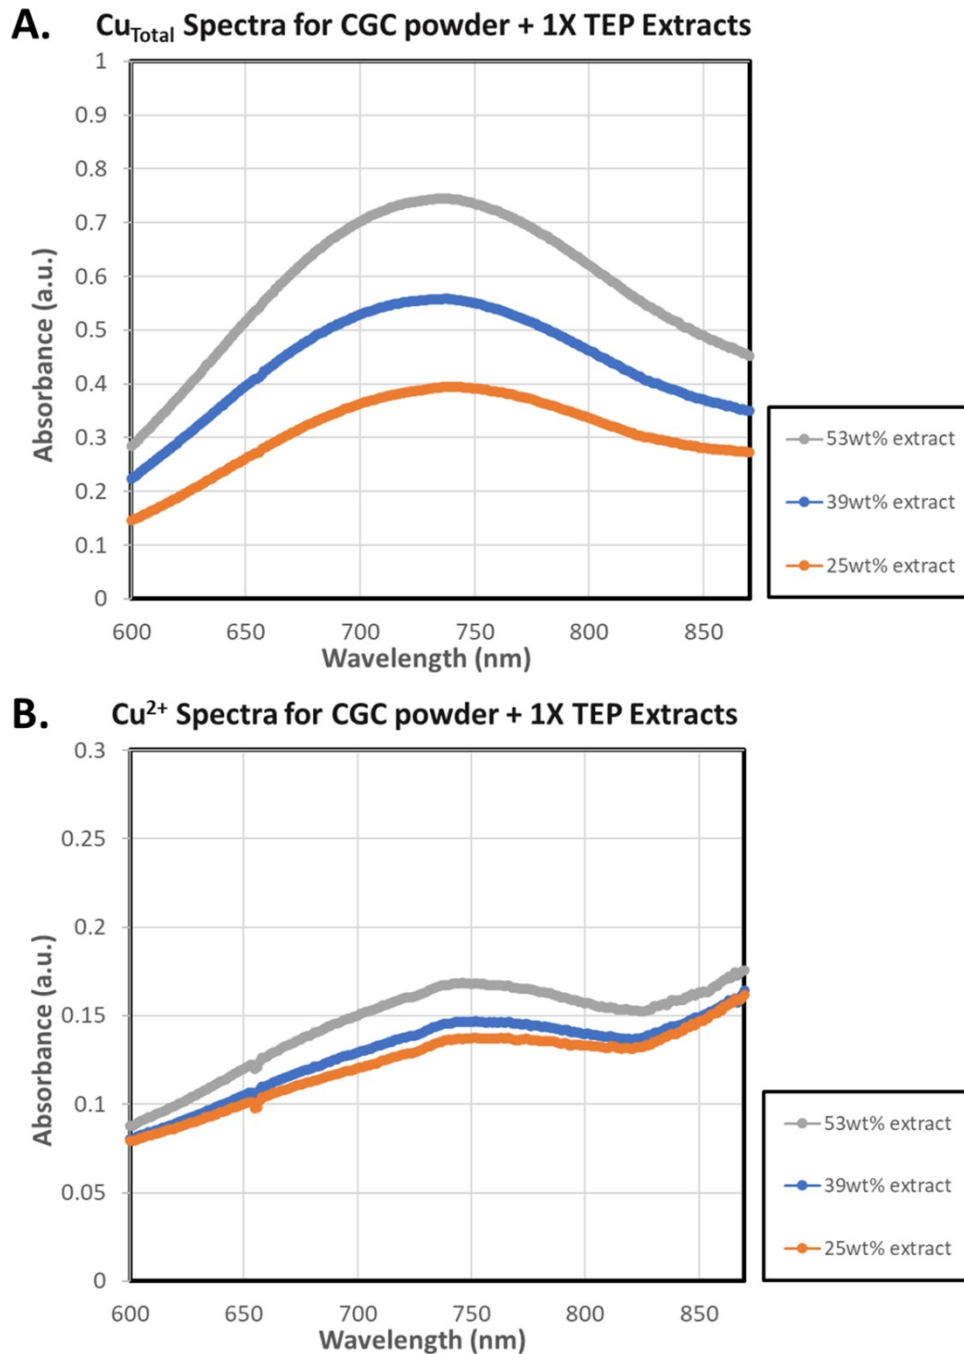

**Figure S3:** UV-vis spectrum for CGC powder extracts with TEP. **A.** Sample  $\text{Cu}_{\text{Tot}}$  curves. **B.** Curves used to derive  $[\text{Cu}^{2+}]$ .  $[\text{Cu}_{\text{Tot}}]$  determination was made by adding 700  $\mu\text{l}$  of 20 mM EDTA, 388  $\mu\text{l}$   $\text{H}_2\text{O}$ , 42  $\mu\text{l}$  of copper extract solution, 20  $\mu\text{L}$  of  $\text{H}_2\text{O}_2$ .  $[\text{Cu}^{2+}]$  determination was made by adding 700  $\mu\text{l}$  of 20 mM EDTA, 398  $\mu\text{l}$   $\text{H}_2\text{O}$ , 42  $\mu\text{l}$  of copper extract solution.  $[\text{Cu}^{1+}]$  is calculated by taking the difference between  $[\text{Cu}_{\text{Tot}}]$  and  $[\text{Cu}^{2+}]$ .

## $^{31}\text{P}\{^1\text{H}\}$ NMR Parameters for Copper(I) Coordination Environment

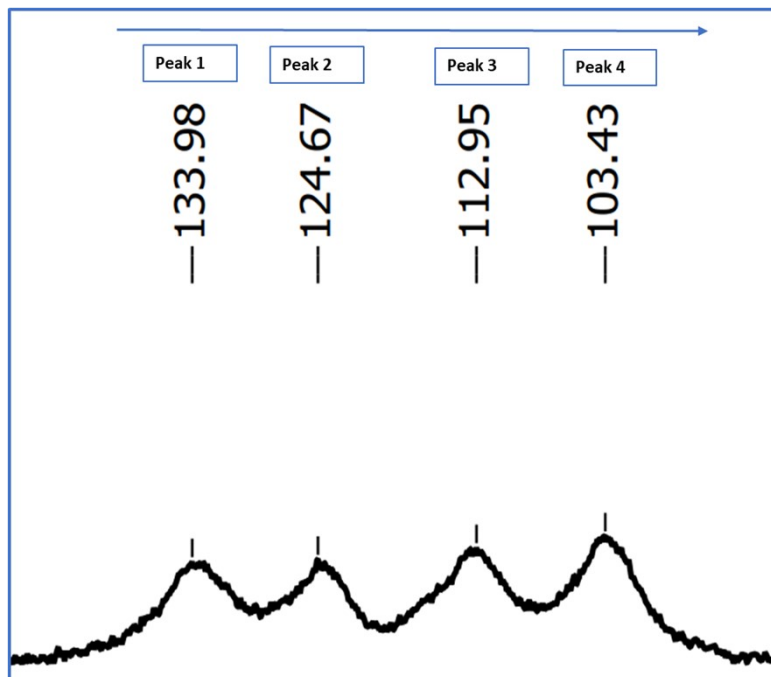

**Figure S4:**  $^{31}\text{P}\{^1\text{H}\}$  NMR spectrum of CGC extract with TEP showing an asymmetric quartet structure due to spin-spin coupling of the phosphorus nuclei to the copper nucleus ( $^{63}\text{Cu}$ ,  $^{65}\text{Cu}$ ;  $I = 3/2$ ) in water.

The following expressions were used to investigate the possible relationship between the  $^{31}\text{P}$  NMR parameters and the coordination environment about the copper(I) atom [1-5].

$$\Delta V1 \text{ (kHz)} = \frac{[121.41 \times (\text{peak 1} - \text{peak 2})]}{1000}$$

$$\Delta V2 \text{ (kHz)} = \frac{[121.41 \times (\text{peak 2} - \text{peak 3})]}{1000}$$

$$\Delta V3 \text{ (kHz)} = \frac{[121.41 \times (\text{peak 3} - \text{peak 4})]}{1000}$$

$$\Delta Vi \text{ (kHz)} = \frac{[\Delta V1 + \Delta V2 + \Delta V3]}{3}$$

| Center $\delta$ | Peak 1 | Peak 2 | Peak 3 | Peak 4 |
|-----------------|--------|--------|--------|--------|
| ppm             | ppm    | ppm    | ppm    | ppm    |
| 118.71          | 133.98 | 124.67 | 112.95 | 103.43 |

**Table 1.** Summary calculations of  $^{31}\text{P}\{^1\text{H}\}$  NMR parameters used to determine number of phosphorous atoms coordinated to the copper(I) center.

|       |     |         |    |        |                          |     |                                  |
|-------|-----|---------|----|--------|--------------------------|-----|----------------------------------|
|       |     |         |    | 118.71 | Center (ppm)             |     |                                  |
| 9.31  | ppm | 1130.33 | Hz | 1.13   | $\Delta V_1$             | kHz | Low field line spacing           |
| 11.72 | ppm | 1422.93 | Hz | 1.42   | $\Delta V_2$             | kHz |                                  |
| 9.52  | ppm | 1155.82 | Hz | 1.16   | $\Delta V_3$             | kHz | High field line spacing          |
|       |     |         |    | 1.24   | $\Delta V_i$ (average)   | kHz | *Coordination number information |
|       |     |         |    | 1.02   | $\Delta V_3/V_1$ (ratio) |     | Asymmetry of the line spacing    |

| <b>*How to interpret the line spacing <math>\langle \Delta V_i \rangle</math> of the quartet?</b> |     |                             |
|---------------------------------------------------------------------------------------------------|-----|-----------------------------|
| ~1.6                                                                                              | kHz | One coordinated phosphine   |
| 1.2                                                                                               | kHz | Two coordinated phosphine   |
| 0.9                                                                                               | kHz | Three coordinated phosphine |

| <b>Interpretation of results</b> |                                                                                                           |
|----------------------------------|-----------------------------------------------------------------------------------------------------------|
| 1.24                             | The derived $\Delta V_{i_{Av}}$ value suggests a two coordinate phosphorous-copper(I) complex is present. |

## Antimicrobial Glass Film Surface Metrology

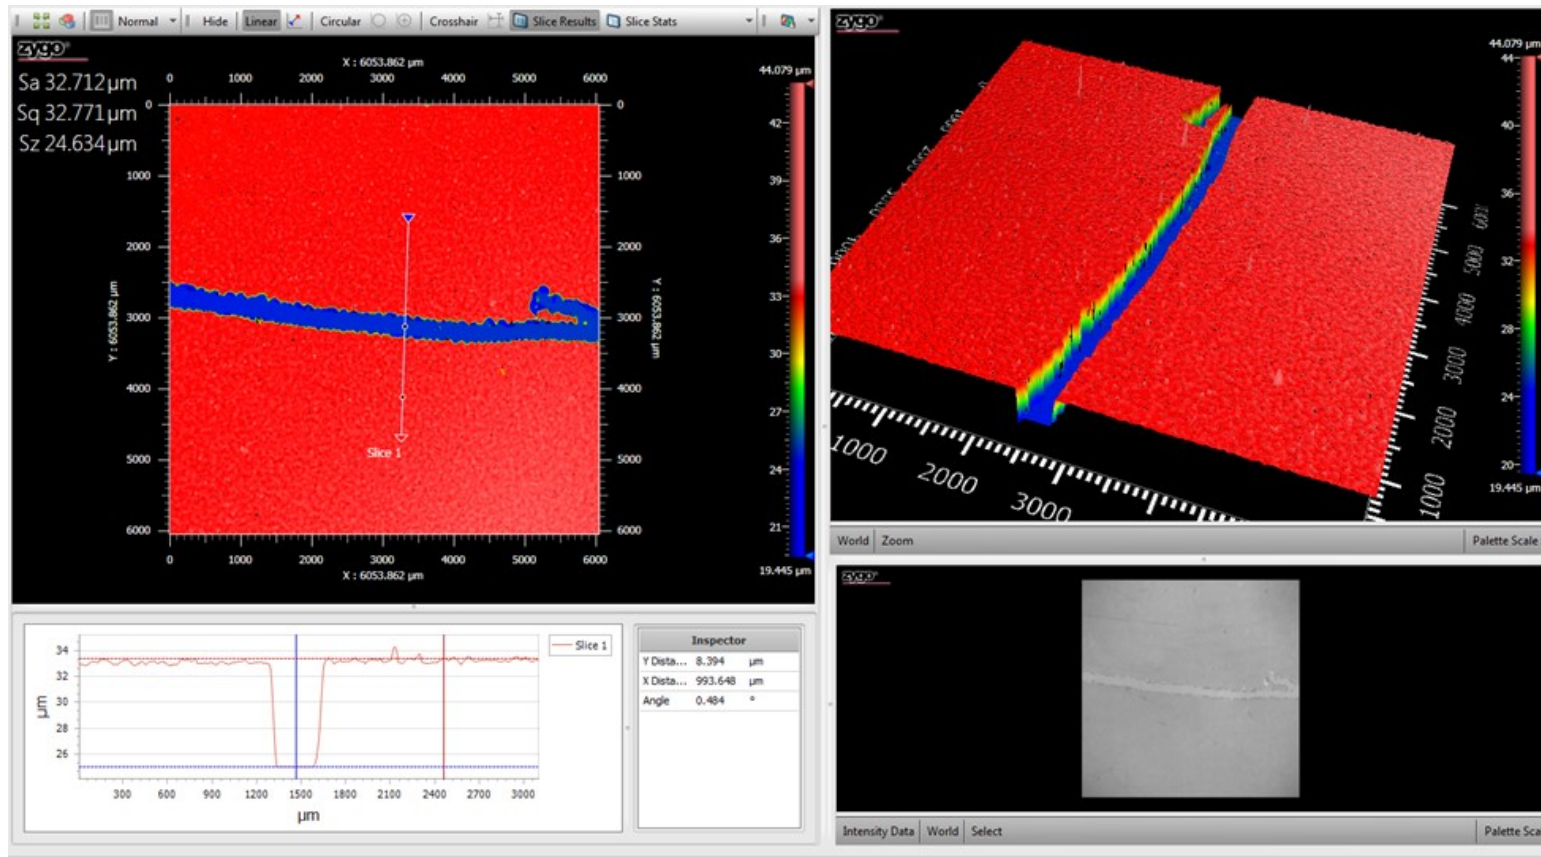

**Figure S5:** Zygo film thickness measurement for Ferro 221 series coating on Corning® EAGLE XG® Glass with no copper glass-ceramic (CGC) powder or CGC powder extract, flash cured at 150 °C.



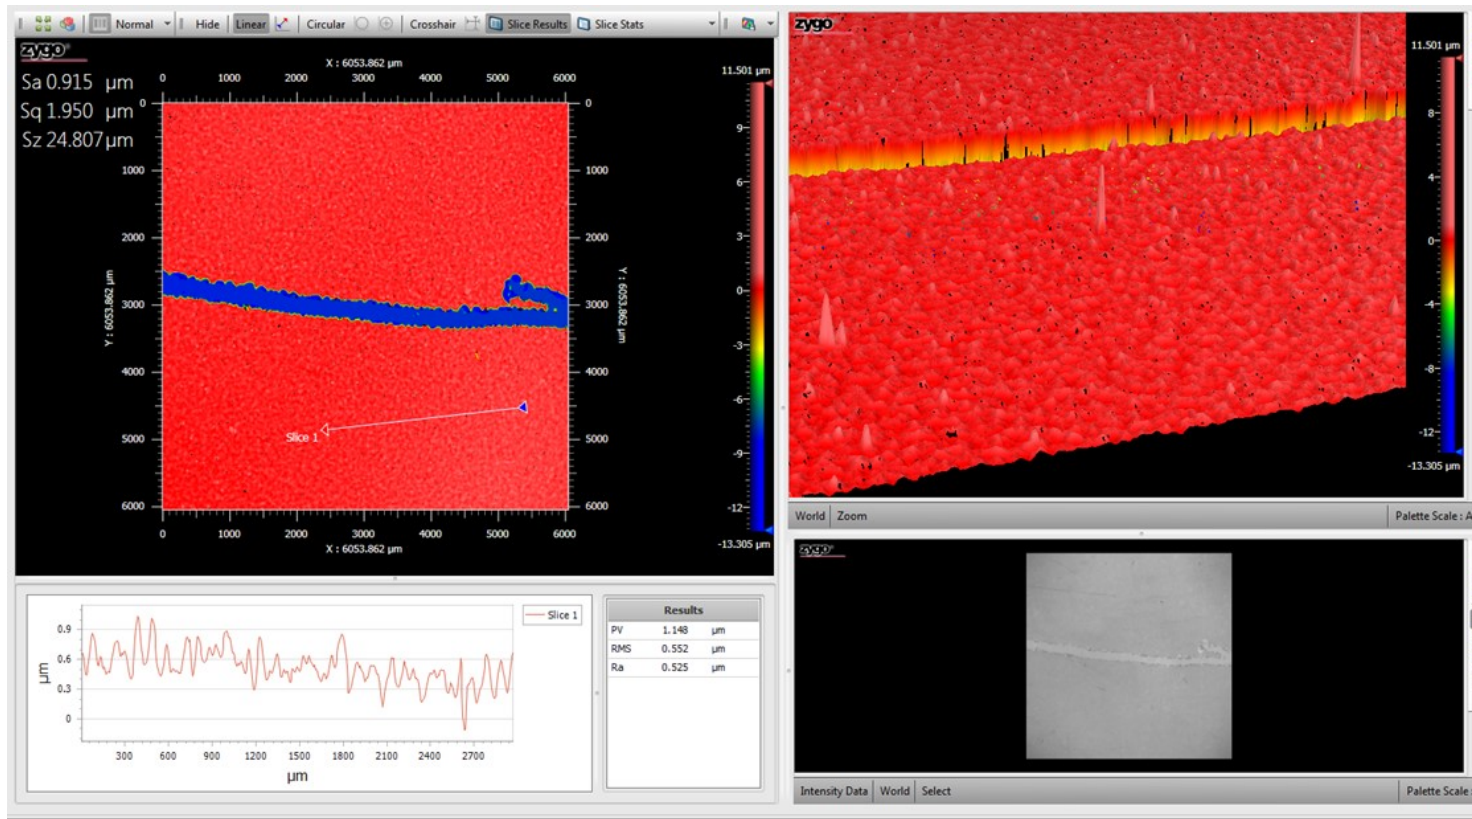

**Figure S6:** Zygo film surface roughness measurement for Ferro 221 series coating on Corning EAGLE XG Glass with no copper glass-ceramic (CGC) powder or CGC powder extract, flash cured at 150 °C.



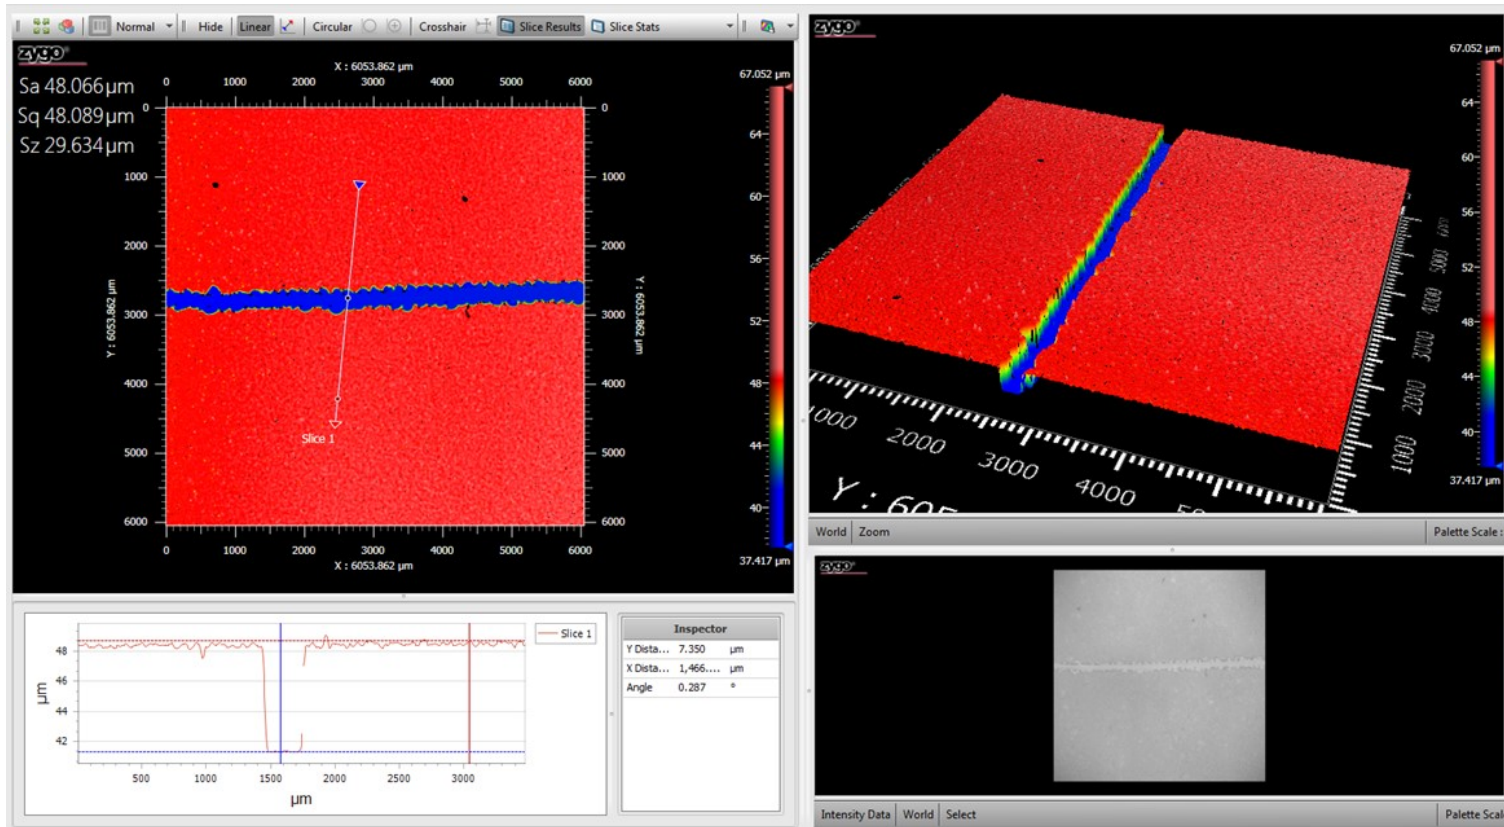

Figure S7: Zygo film thickness measurement for Ferro 221 glass coating on Corning EAGLE XG Glass dosed with copper glass-ceramic (CGC) powder extracts with triethyl phosphite (TEP) ( $[\text{Cu}]_{\text{Tot}} = 600\text{ppm}$ ) and cured at 120  $^{\circ}\text{C}$ .

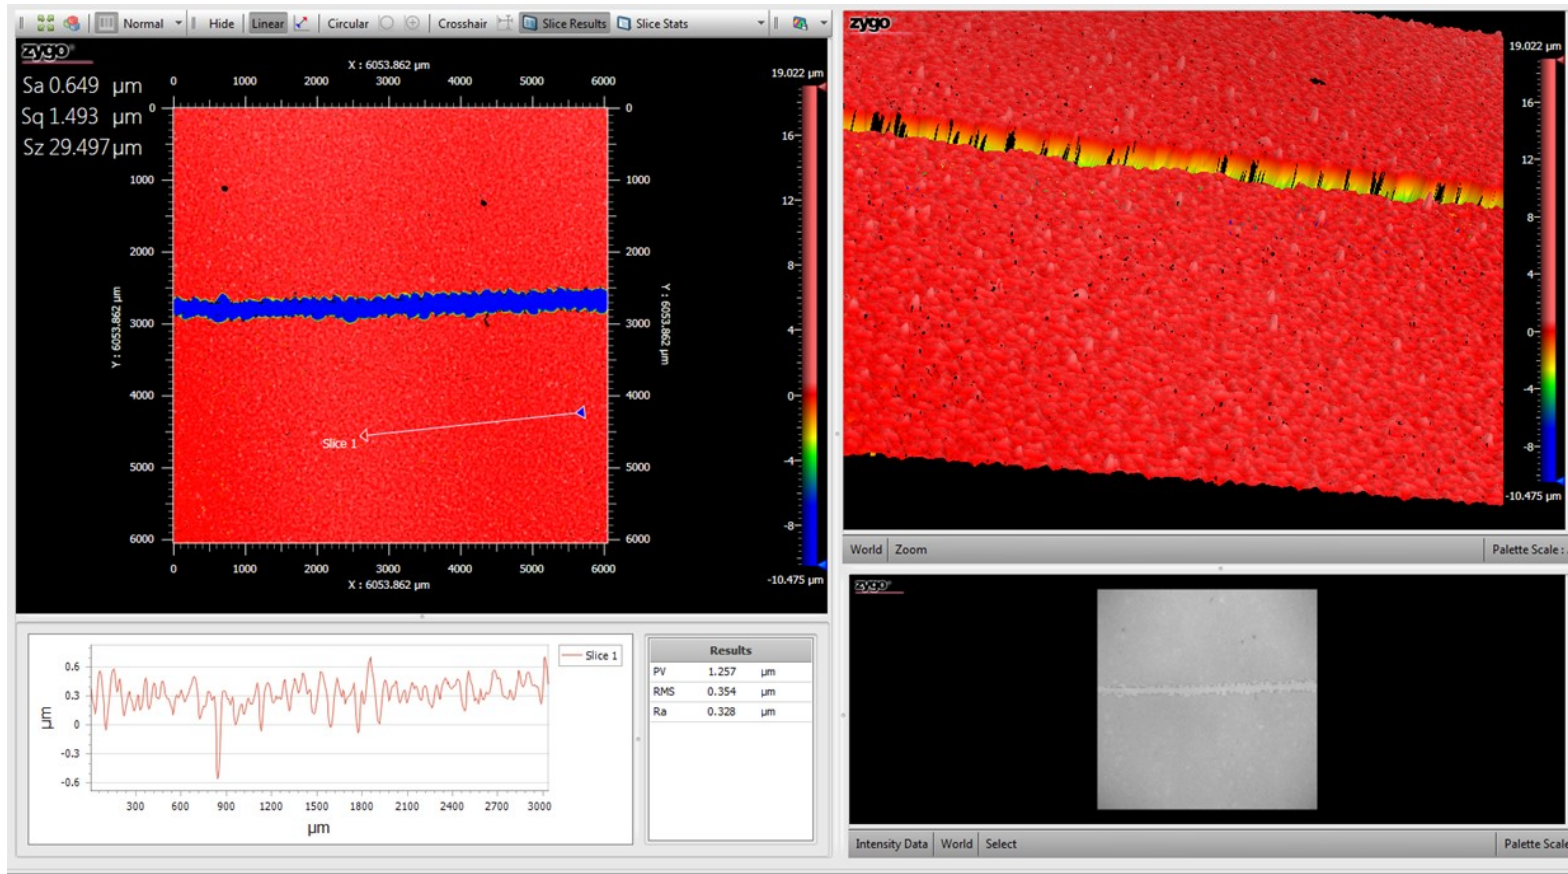

**Figure S8:** Zygo film surface roughness measurement for Ferro 221 glass coating on Corning EAGLE XG Glass dosed with copper glass-ceramic (CGC) powder extracts with triethyl phosphite (TEP) ( $[Cu]_{Tot} = 600\text{ppm}$ ) and cured at 120 °C.

## References:

1. Bowmaker, G.A., et al., *Structural, vibrational and solid-state NMR studies of the halogenocuprate (I) complexes [(PPh<sub>3</sub>)<sub>2</sub>CuI<sub>2</sub>]-and [(PPh<sub>3</sub>) CuI<sub>3</sub>Cu (PPh<sub>3</sub>)]*. *Inorganic Chemistry*, 1989. **28**(20): p. 3883-3888.
2. Tisato, F., et al., *Synthesis, characterization, and crystal structure of the water soluble copper (I) complex with trisulfonated triphenylphosphine*. *Inorganic Chemistry*, 2001. **40**(6): p. 1394-1396.
3. Kroeker, S., et al., *Anisotropy in the <sup>31</sup>P, <sup>63</sup>/<sup>65</sup>Cu Indirect Spin-Spin Coupling and <sup>31</sup>P Nuclear Shielding Tensors of Linear Copper (I) Phosphines*. *Journal of Magnetic Resonance*, 1998. **135**(1): p. 208-215.
4. Muetterties, E. and C. Alegranti, *Solution structure and kinetic study of metal-phosphine and-phosphite complexes. I. Silver (I) system*. *Journal of the American Chemical Society*, 1972. **94**(18): p. 6386-6391.
5. King, R.W., T. Huttemann, and J. Verkade, *<sup>63</sup> Cu-and <sup>65</sup> Cu-<sup>31</sup> P spin-spin coupling in copper (I) trialkyl phosphite complexes*. *Chemical Communications (London)*, 1965(21): p. 561a-561a.
